# Supplementary material
Source: PubMed Central journal article supplement (PMC5519428)
Supplement: NIHMS857130-supplement-Supp_info.pdf [file NIHMS857130-supplement-Supp_info.pdf]

## Supplemental figure 1

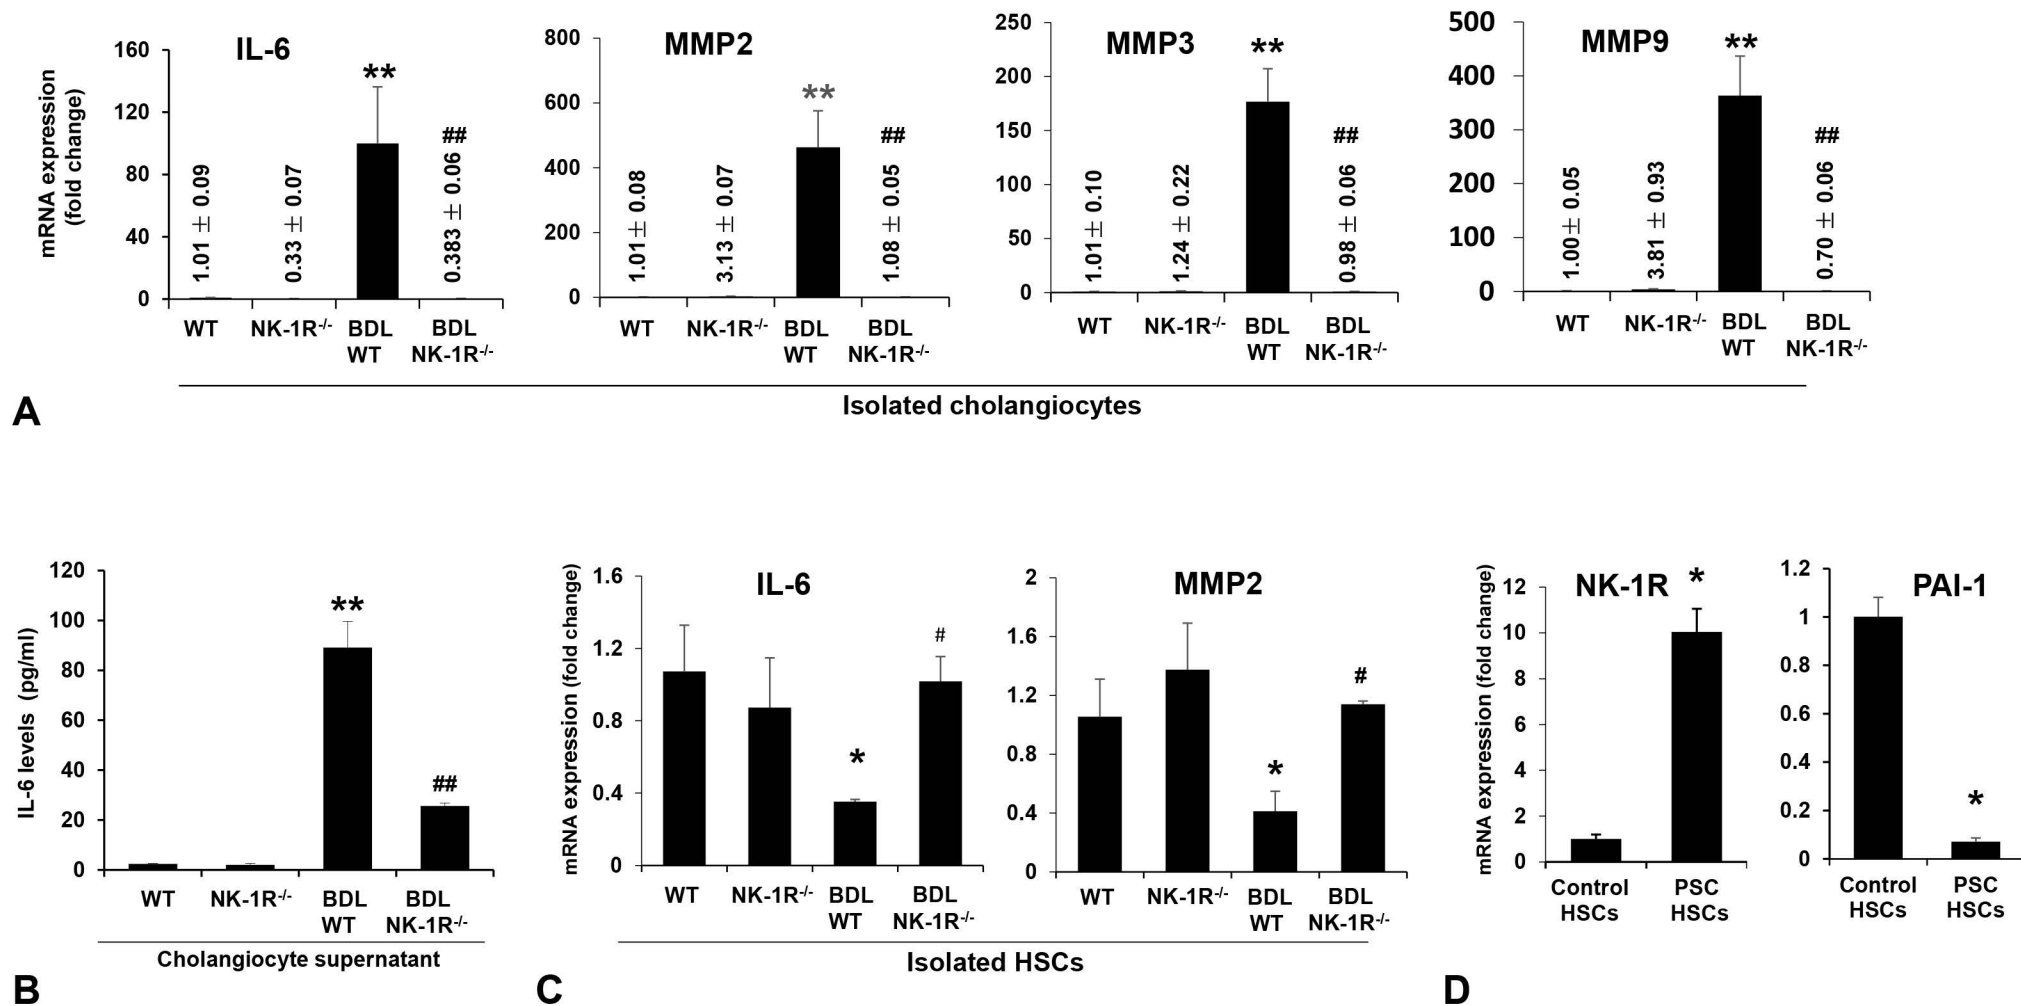

## Supplemental figure 2

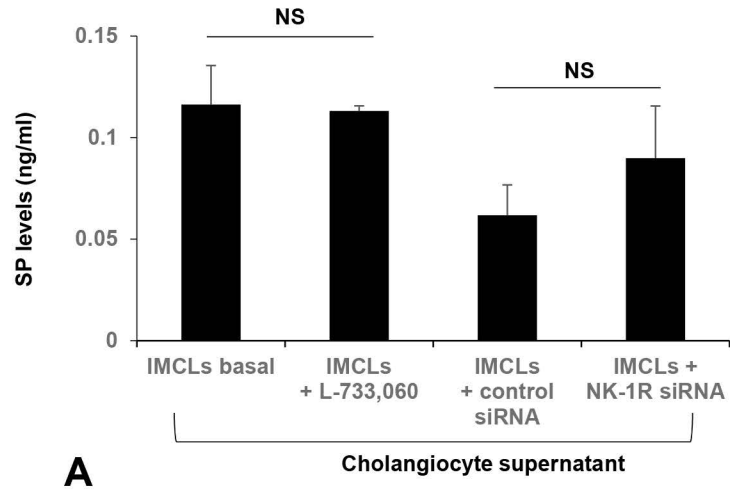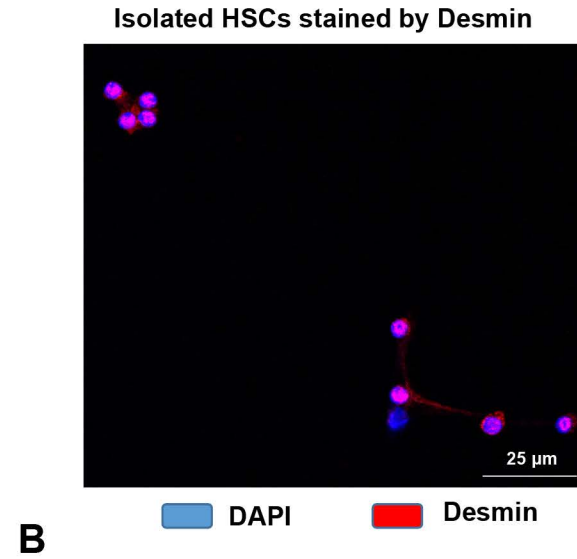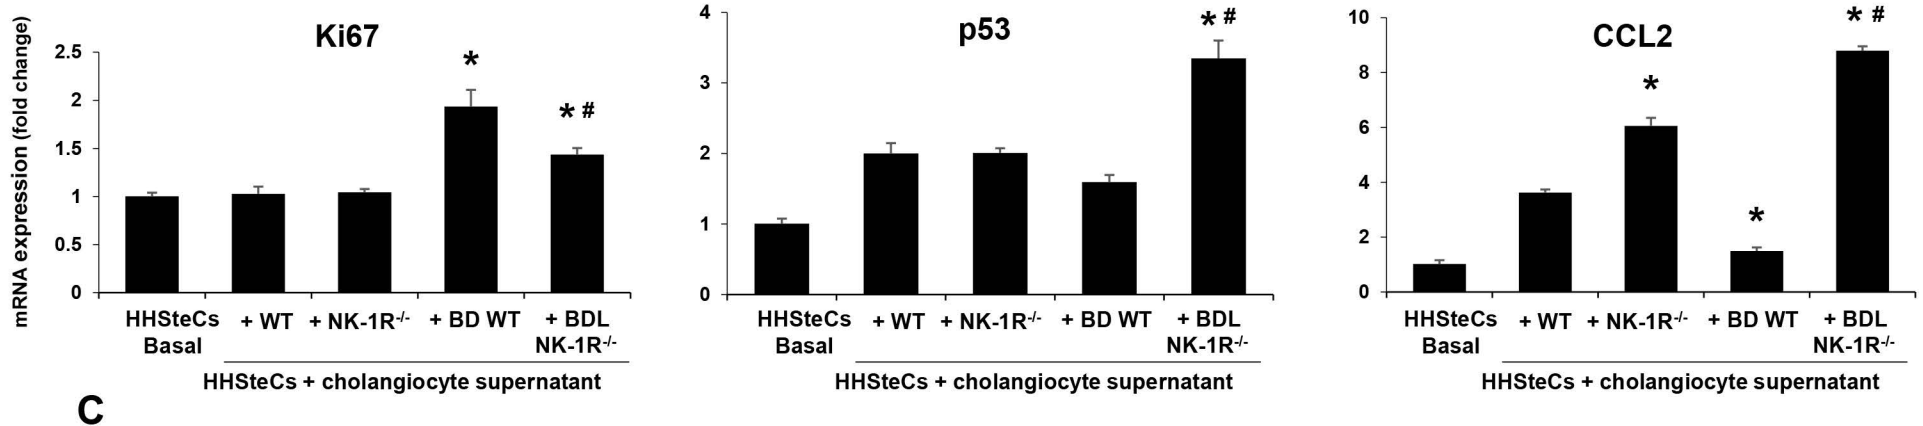

## Supplementary information

### Supplementary Figure legends

**Supplementary Figure 1** [A-C] There was reduced expression of IL-6, MMP2, MMP3 and MMP9 in cholangiocytes as well as IL-6 levels in cholangiocyte supernatant (n=6) but increased expression of IL-6 and MMP2 in HSCs (n=3) from BDL NK-1R<sup>-/-</sup> mice compared to BDL WT mice. [D] There was enhanced expression of NK-1R and decrease expression of PAI-1 in LCM-isolated HSCs from late stage PSC patients compared to control samples (n = 3). \**P*<0.05, \*\**P*<0.01 vs. normal WT mice or control HSCs. #*P*<0.05, ##*P*<0.01 vs. BDL WT mice.

**Supplementary Figure 2** [A] No significant changes in SP levels were observed in the supernatant of IMCLs treated with L-733,060 compared to basal and in IMCLs transfected with NK-1R siRNA compared to IMCLs transfected with control siRNA. [B] The isolated HSCs from FVB/NJ normal WT mice was confirmed by staining with  $\alpha$ -SMA. (Magnification,  $\times 63$ ). [C] There was decreased expression of Ki67 but increased expression of p53 and CCL2 in HHStECs treated with cholangiocyte supernatant from BDL NK-1R<sup>-/-</sup> mice compared to HHStECs treated with cholangiocyte supernatant from BDL WT mice. \**P*<0.05 vs. HHStECs treated with cholangiocyte supernatant from normal WT mice. #*P*<0.05 vs. HHStECs treated with cholangiocyte supernatant from BDL WT mice.

**Supplementary Table 1. Characteristics of Healthy Controls and PSC Patients**

| <b>Groups</b>          | <b>Patient</b> | <b>Diagnosis</b> | <b>Sample</b>              | <b>Gender</b> | <b>Cirrhosis</b> | <b>Therapy</b> | <b>Origin</b>               |
|------------------------|----------------|------------------|----------------------------|---------------|------------------|----------------|-----------------------------|
| <b>Control</b>         | 1              | Normal Liver     | RNA                        | Male          |                  | Untreated      | BioChain                    |
|                        | 2              | Normal Liver     | RNA                        | Male          |                  | Untreated      | BioChain                    |
|                        | 3              | Normal Liver     | RNA                        | Male          |                  | Untreated      | BioChain                    |
| <b>PSC</b>             | 1              | Late stage PSC   | RNA from paraffin sections | Male          | Yes              | Untreated      | Humanitas Research Hospital |
|                        | 2              | Late stage PSC   | RNA from paraffin sections | Male          | No               | Untreated      | Humanitas Research Hospital |
|                        | 3              | Late stage PSC   | RNA from paraffin sections | Male          | No               | Untreated      | Humanitas Research Hospital |
| <b>Control</b>         | 1              | Normal Liver     | Serum                      | Male          |                  |                | Humanitas Research Hospital |
|                        | 2              | Normal Liver     | Serum                      | Male          |                  |                | Humanitas Research Hospital |
|                        | 3              | Normal Liver     | Serum                      | Male          |                  |                | Humanitas Research Hospital |
| <b>Early stage PSC</b> | 1              | Early stage PSC  | Serum                      | Male          | No               | Untreated      | Humanitas Research Hospital |
|                        | 2              | Early stage PSC  | Serum                      | Male          | No               | Untreated      | Humanitas Research Hospital |
|                        | 3              | Early stage PSC  | Serum                      | Male          | No               | Untreated      | Humanitas Research Hospital |
| <b>Late stage PSC</b>  | 1              | Late stage PSC   | Serum                      | Male          | No               | Untreated      | Humanitas Research Hospital |
|                        | 2              | Late stage PSC   | Serum                      | Male          | No               | Untreated      | Humanitas Research Hospital |
|                        | 3              | Late stage PSC   | Serum                      | Male          | No               | Untreated      | Humanitas Research Hospital |

PSC = Primary Sclerosing Cholangitis. Unidentified human samples were obtained from Dr. P. Invernizzi (Humanitas Research Hospital, Rozzano, Italy).

**Supplementary Table 2. Evaluation of serum levels of alanine aminotransferase, aspartate aminotransferase, alkaline phosphatase and bilirubin**

| Groups                                      | Alanine<br>Aminotransferase,<br>units/L | Aspartate<br>Aminotransferase,<br>Units/L | Alkaline<br>Phosphatase,<br>Units/L | Total<br>Bilirubin,<br>mg/dL |
|---------------------------------------------|-----------------------------------------|-------------------------------------------|-------------------------------------|------------------------------|
| FVB/NJ<br>WT<br>(n=14)                      | 144.00±24.61                            | 379.00±71.81                              | 86.29±7.53                          | 0.16±0.02                    |
| Mdr2 <sup>-/-</sup><br>(n=28)               | 454.43±31.36*                           | 608.00±51.37*                             | 305.00±21.63*                       | 0.23±0.02*                   |
| Mdr2 <sup>-/-</sup> +<br>L-733,060<br>(n=6) | 142.33±14.19 <sup>#</sup>               | 307.50±47.51 <sup>#</sup>                 | 199.00±22.30* <sup>#</sup>          | 0.13±0.03 <sup>#</sup>       |

\*  $P < 0.05$  vs. FVB/NJ WT; <sup>#</sup>  $P < 0.05$  vs. Mdr2<sup>-/-</sup>.

Supplementary Table 3.

## List of commercially available real-time PCR primers used

| Gene                  | Species | Detected transcript | Source |
|-----------------------|---------|---------------------|--------|
| ACTA2( $\alpha$ -SMA) | Mouse   | NM_007392           | QIAGEN |
| CCL2                  | Mouse   | NM_011333           | QIAGEN |
| Cdkn1a (p21)          | Mouse   | NM_001111099        | QIAGEN |
| Cdkn2a (p16)          | Mouse   | NM_001040654        | QIAGEN |
| Coll $\alpha$ 1       | Mouse   | NM_007742           | QIAGEN |
| Fn-1                  | Mouse   | NM_010233           | QIAGEN |
| GAPDH                 | Mouse   | NM_008084           | QIAGEN |
| IL-6                  | Mouse   | NM_031168           | QIAGEN |
| MMP2                  | Mouse   | NM_008610           | QIAGEN |
| MMP3                  | Mouse   | NM_010809           | QIAGEN |
| MMP9                  | Mouse   | NM_013599           | QIAGEN |
| TAC1                  | Mouse   | NM_009311           | QIAGEN |
| TACR1 (NK-1R)         | Mouse   | NM_009313           | QIAGEN |
| TGF- $\beta$ 1        | Mouse   | NM_011577           | QIAGEN |
| ACTA2( $\alpha$ -SMA) | Human   | NM_001141945        | QIAGEN |
| CCL2                  | Human   | NM_002982           | QIAGEN |
| Cdkn1a (p21)          | Human   | NM_000389           | QIAGEN |
| Cdkn2a (p16)          | Human   | NM_000077           | QIAGEN |
| Coll $\alpha$ 1       | Human   | NM_000088           | QIAGEN |
| GAPDH                 | Human   | NM_001256799        | QIAGEN |
| Ki67                  | Human   | NM_001145966        | QIAGEN |
| p53                   | Human   | NM_000546           | QIAGEN |
| Serpine 1(PAI-1)      | Human   | NM_000602           | QIAGEN |
| Smad2                 | Human   | NM_001003652        | QIAGEN |
| TAC1                  | Human   | NM_003182           | QIAGEN |
| TACR1 (NK-1R)         | Human   | NM_001058           | QIAGEN |
| TGF- $\beta$ 1        | Human   | NM_000660           | QIAGEN |

## Supplementary Materials and methods

### *Materials*

Reagents were purchased from Sigma-Aldrich Chemical Co. (St. Louis, MO) unless otherwise indicated. The rabbit polyclonal antibody against NK-1R was purchased from Thermo Fisher Scientific (Rockford, IL). The following were purchased from Abcam (Burlingame, CA): (i) rabbit polyclonal antibodies against monocyte chemoattractant protein-1 (MCP-1/CCL2),  $\alpha$ -SMA and fibronectin-1 (Fn-1); and (ii) rabbit monoclonal antibodies against desmin (a marker of HSCs)<sup>(1)</sup> and cytokeratin-19 (CK-19). Mouse antibodies against p16 and p21 were purchased from Santa Cruz Biotechnology (Dallas, TX). ELISA kits to measure transforming growth factor- $\beta$ 1 (TGF- $\beta$ 1) levels were purchased from Affymetrix Inc. (Santa Clara, CA). Mouse IL-6 ELISA kit was purchased from BD Bioscience (San Jose, CA). Synthetic SP and EIA kits (for detecting SP levels) were purchased from Phoenix Pharmaceuticals (Belmont, CA). The NK-1R antagonist (L-733,060)<sup>(2)</sup> was purchased from Tocris Bioscience (Minneapolis, MN). The RNeasy Mini Kit for RNA purification and all selected primers were purchased from Qiagen (Valencia, CA). The iScript cDNA Synthesis Kit (170-8891) and iTaq Universal SYBR Green Supermix (172-5124) were purchased from Bio-Rad (Hercules, CA). All of primers for real-time PCR were purchased from Qiagen (Valencia, CA) and specific information about the primers is listed in Supplementary Table 3.

### Supplementary references

1. Puche JE, Lee YA, Jiao J, Aloman C, Fiel MI, Munoz U, Kraus T, et al. A novel murine model to deplete hepatic stellate cells uncovers their role in amplifying liver damage in mice. *Hepatology* 2013;57:339-350.
2. **Meng F, DeMorrow S**, Venter J, Frampton G, Han Y, Francis H, Standeford H, et al. Overexpression of membrane metalloendopeptidase inhibits substance P stimulation of cholangiocarcinoma growth. *Am J Physiol Gastrointest Liver Physiol* 2014;306:G759-768.
